# Supplementary material for: Architecting a Janus biomass carbon/sponge evaporator with salt-rejection and ease of floatation for sustainable solar-driven desalination
Source: Royal Society of Chemistry journal article supplement (doi:10.1039/d1ew00070e), 2021-01-01
Supplement: d1ew00070e1.pdf [file d1ew00070e1.pdf]

## Supporting information

### **Architecting a Janus biomass carbon/sponge evaporator with salt-rejection and easy-floatation for sustainable solar-driven steam generation**

*Keyuan Xu,<sup>a</sup> Chengbing Wang,<sup>a,b\*</sup> Zhengtong Li,<sup>a</sup> Xinyue Yan,<sup>a</sup> Xueyang Mu,<sup>a</sup> Miaomaio Ma,<sup>a</sup> Pengkui Zhang<sup>a</sup>*

K. Xu, Prof. C. Wang, Z. Li, X. Yan, X. Mu, M. Ma, P. Zhang

<sup>a</sup> School of Materials Science and Engineering, Shaanxi Key Laboratory of Green Preparation and Functionalization for Inorganic Material, Shaanxi University of Science & Technology, Xi'an, Shaanxi 710021, China

<sup>b</sup> Zhejiang Wenzhou Research Institute of Light Industry, Wenzhou 325003, Zhejiang, P. R. China.

Email: wangchengbing@gmail.com

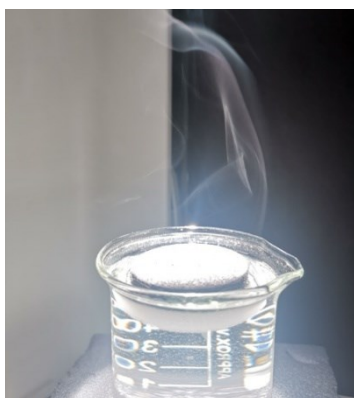

Figure S1. Digital photos of steam generated under 3 solar irradiation of JBCS.

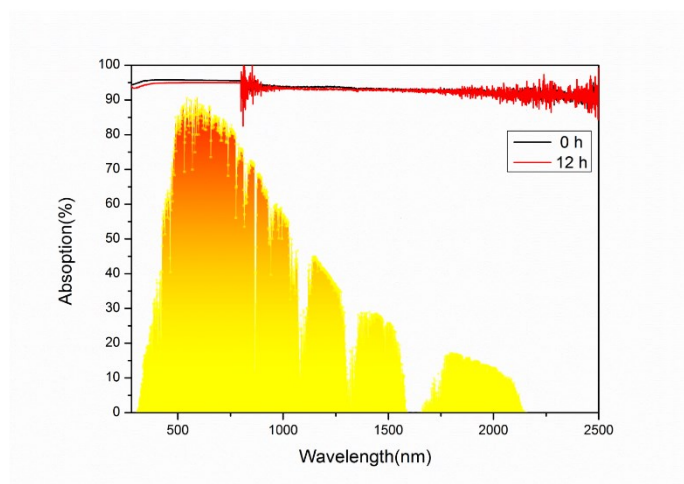

Figure S2. Absorption spectrum of JBCS before and after 12 h steam generation under 1 sun irradiation.

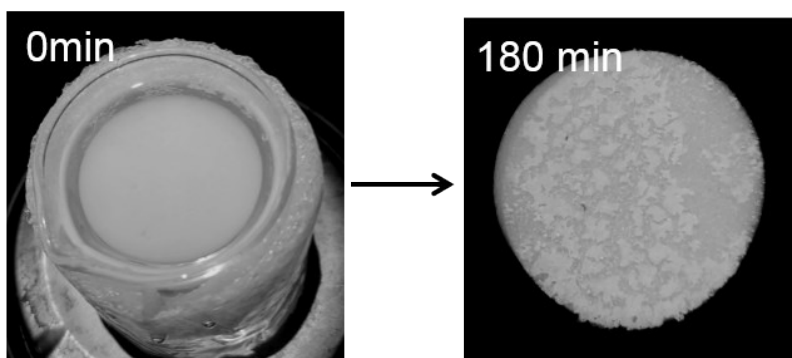

Figure S3. Camera photos of MS before and after 180 min solar steam generation (1 kW m<sup>-2</sup>).

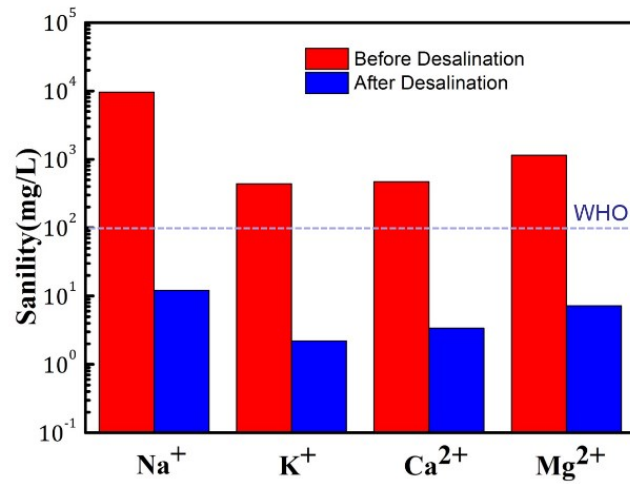

Figure S4. The measured concentrations of four primary ions in a simulated seawater sample before and after desalination.

The energy contribution of each part of the JBCS evaporator in the steam generation process.

(1) Water evaporation loss  $\theta_1$

The water evaporation loss of JBCS is approximately equal to the evaporation efficiency, so  $\theta_1 \sim 86.5\%$ .

(2) Sunlight reflection loss  $\theta_2$

Measured by UV spectrophotometer,  $\theta_2 \sim 4\%$ .

(3) Conduction loss  $\theta_3$

$$\theta_3 = (J_{cond} / J_{in}) \cdot A$$

Calculated according to Fourier's law,  $J_{cond} = k \cdot (\Delta T / L)$ ,  $k$  represents the thermal conductivity of the evaporator, which is 0.046 W m<sup>-1</sup> K<sup>-1</sup>.  $\Delta T / L$  is the temperature gradient

of the JBCS evaporator, about 842 K/m.  $J_{in}$  represents a standard sunlight, which is 1 kW m<sup>-2</sup>. After many statistical calculations,  $A$  is about 8. It can be seen that  $\theta_3$  is approximately 3.1%.

(4) Radiation loss  $\theta_4$

$\theta_4 = A \varepsilon \sigma (T_1^4 - T_2^4)$  ,  $\varepsilon=0.92$  ,  $\sigma=5.67 \times 10^{-8}$  W m<sup>-2</sup> K<sup>-4</sup> ,  $T_1$  is the average surface temperature of the evaporator under one sun exposure, about 310 K,  $T_2$  is the ambient temperature (301 K), in result,  $\theta_4 \approx 4.3\%$ .

(5) Convection loss  $\theta_5$

$\theta_5 = h A \Delta T$ ,  $h=5$  W m<sup>-2</sup> K<sup>-1</sup>,  $\Delta T = 310$  K. Thus,  $\theta_5 \approx 1.3\%$ .

Therefore, 86.5% + 4% + 3.1% + 4.3% + 1.3% = 99.2%, other 0.8% of energy may disappear in other forms of diffusion.
